# Supplementary material for: 1-m-Nitrobenzoyl semicarbazide: reversible colorimetric cascade indicators for fluoride and moisture
Source: Royal Society of Chemistry journal article supplement (doi:10.1039/d0nj03769a), 2020-01-01

## Supporting Information

### **1-*m*-Nitrobenzoyl semicarbazide: reversible colorimetric cascade indicators for fluoride and moisture†**

*Sujay Kumar Nandi and Debasish Haldar\**

Department of Chemical Sciences, Indian Institute of Science Education and Research  
Kolkata, Mohanpur -741246, West Bengal, India.

Fax: (+)913325873020; Tel: +913325873119;

**Corresponding Author** E-mail: [deba\\_h76@yahoo.com](mailto:deba_h76@yahoo.com); [deba\\_h76@iiserkol.ac.in](mailto:deba_h76@iiserkol.ac.in) (D. H.)

## Table of contents

|                                                 |            |
|-------------------------------------------------|------------|
| <i>1. Supporting information Scheme S1</i>      | <i>S3</i>  |
| <i>2. Supporting information Figure S1</i>      | <i>S3</i>  |
| <i>3. Hydrogen bonding parameters: Table S1</i> | <i>S3</i>  |
| <i>4. Supporting information Figure S2</i>      | <i>S4</i>  |
| <i>5. Supporting information Figure S3</i>      | <i>S5</i>  |
| <i>6. Supporting information Figure S4</i>      | <i>S6</i>  |
| <i>7. Supporting information Figure S5</i>      | <i>S7</i>  |
| <i>8. Supporting information Figure S6</i>      | <i>S8</i>  |
| <i>9. Supporting information Figure S7</i>      | <i>S8</i>  |
| <i>10. Supporting information Figure S8</i>     | <i>S9</i>  |
| <i>11. Supporting information Figure S9</i>     | <i>S10</i> |
| <i>12. Supporting information Figure S10</i>    | <i>S10</i> |
| <i>13. Supporting information Figure S11</i>    | <i>S11</i> |
| <i>14. Supporting information Figure S12</i>    | <i>S11</i> |
| <i>15. Supporting information Figure S13</i>    | <i>S12</i> |
| <i>15. Supporting information Scheme S2</i>     | <i>S12</i> |
| <i>16. Supporting information Scheme S3</i>     | <i>S12</i> |
| <i>16. Supporting information Figure S14</i>    | <i>S13</i> |
| <i>17. Supporting information Figure S15</i>    | <i>S13</i> |
| <i>18. Supporting information Figure S16</i>    | <i>S13</i> |
| <i>19. Supporting information Figure S17</i>    | <i>S14</i> |
| <i>20 Supporting information     Figure S18</i> | <i>S14</i> |
| <i>21 Supporting information Figure S19</i>     | <i>S15</i> |
| <i>21 Supporting information Figure S20</i>     | <i>S15</i> |
| <i>20. Supporting information Figure S21</i>    | <i>S16</i> |
| <i>21. Supporting information Figure S22</i>    | <i>S16</i> |

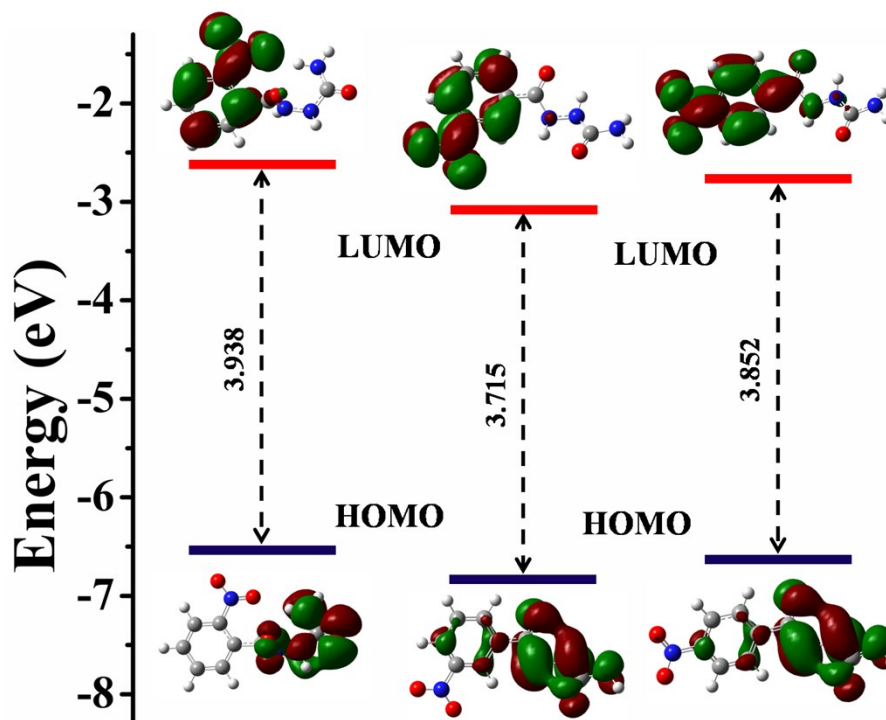

**Figure S1:** The molecular orbital diagram of the 1-*o*-nitrobenzoyl semicarbazide **2** (HOMO - 6.562; LUMO -2.624), 1-*m*-nitrobenzoyl semicarbazide **1** (HOMO -6.809, LUMO -3.094) and 1-*p*-nitrobenzoyl semicarbazide **3** (HOMO -6.635; LUMO -2.783).

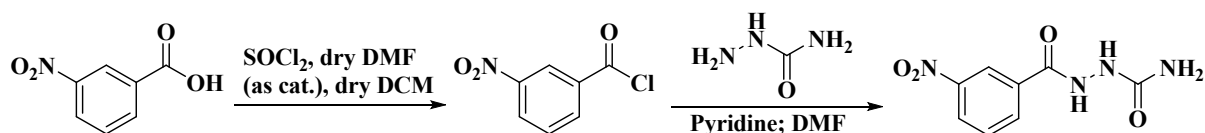

**Scheme S1:** Schematic representation for the formation of compound **1**.

**Table S1:**

Hydrogen bonding parameters for compound **1**:

| D–H···A                        | D···H (Å) | H···A (Å) | D···A (Å)  | D–H···A (°) |
|--------------------------------|-----------|-----------|------------|-------------|
| N2 --- H2 .... O4 <sup>a</sup> | 0.8800    | 2.2100    | 2.8532(18) | 129.00      |
| N3 --- H3 .... O4 <sup>b</sup> | 0.8800    | 2.0200    | 2.7884(17) | 146.00      |
| N4 --- H4A ... O3 <sup>c</sup> | 0.8800    | 2.1400    | 2.9931(19) | 163.00      |
| N4 --- H4B ... O4 <sup>b</sup> | 0.8800    | 2.5100    | 3.0897(17) | 124.00      |
| N4 --- H4B ... O3 <sup>d</sup> | 0.8800    | 2.4300    | 3.0508(19) | 128.00      |
| N4 --- H4B ... N3 <sup>d</sup> | 0.8800    | 2.5500    | 3.2833(19) | 141.00      |

Symmetry: a = 1-x,1-y,1-z; b = x,1+y,z; c = -x,1-y,1-z; d = -x,2-y,1-z

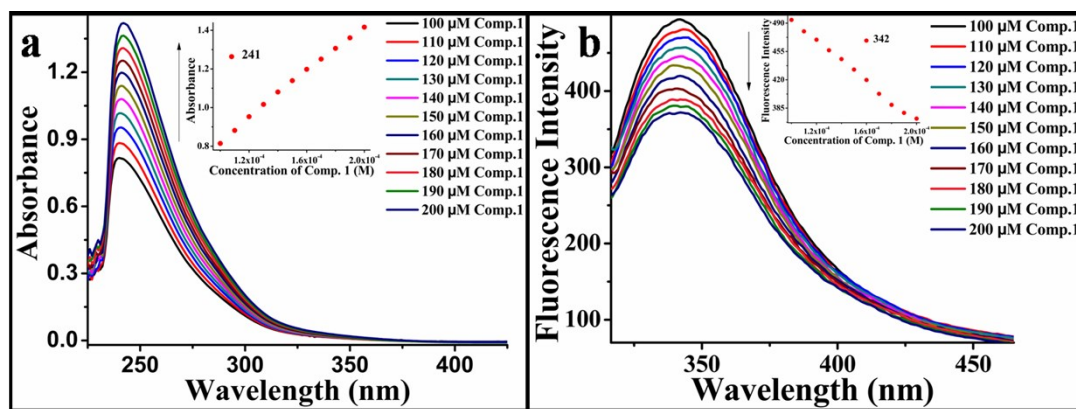

**Figure S2:** Concentration-dependent UV-Vis (a) and fluorescence spectra (excitation at 254 nm) (b) (inset graph indicate the linear increment and decrement with conc. respectively).

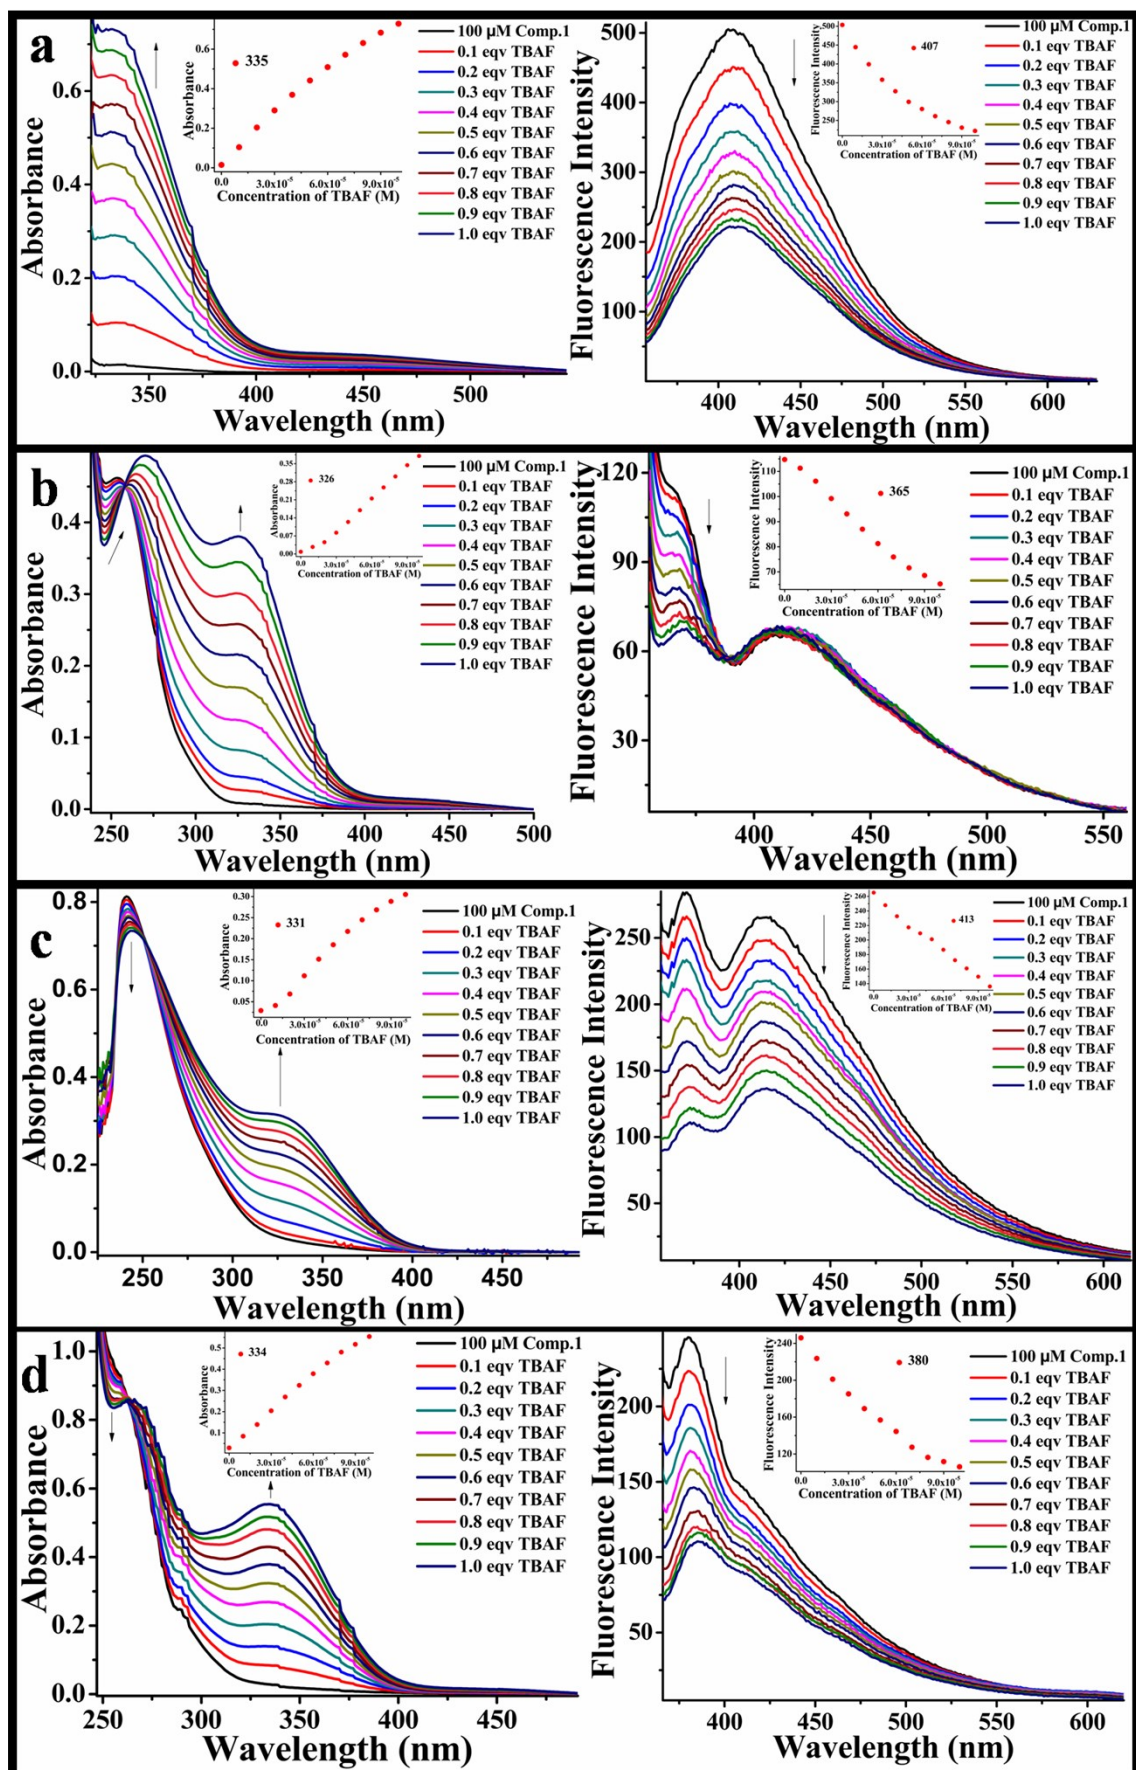

**Figure S3:** Absorption and emission spectra (excitation at 330 nm) of compound 1 with the gradual addition of fluoride ion in different solvents, (a) Acetone; (b) ACN; (c) DMSO; (d) THF (inset graph indicate the linear increment and decrement with TBAF conc. respectively).

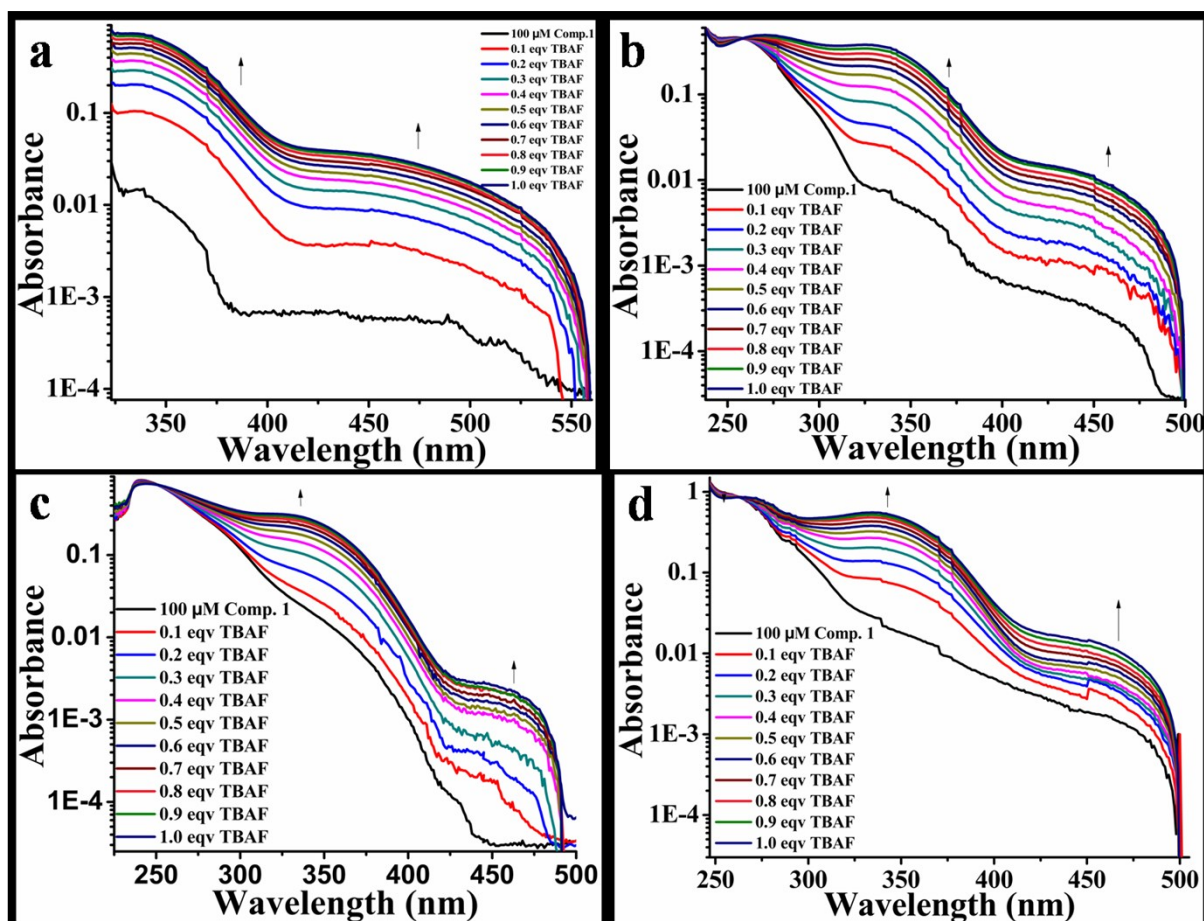

**Figure S4:** Absorption spectra of compound 1 with the gradual addition of fluoride ion in different solvents, (a) Acetone; (b) ACN; (c) DMSO; (d) THF (Every graph as represented in logarithmic scale for better understanding of the band at around 466 nm).



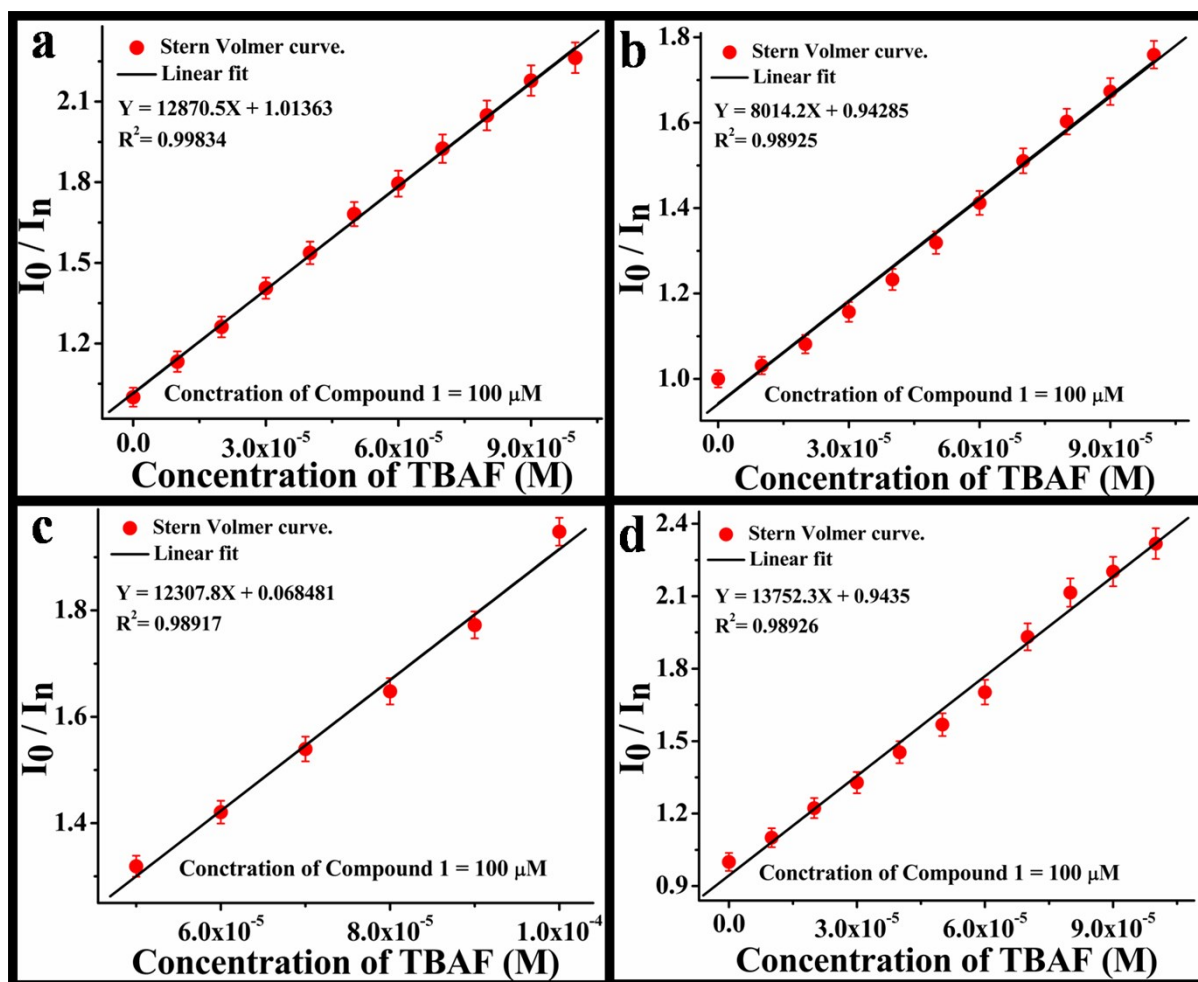

**Figure S5:** Stern-Volmer plot for fluoride ion binding in different solvents, (a) Acetone; (b) ACN; (c) DMSO; (d) THF.

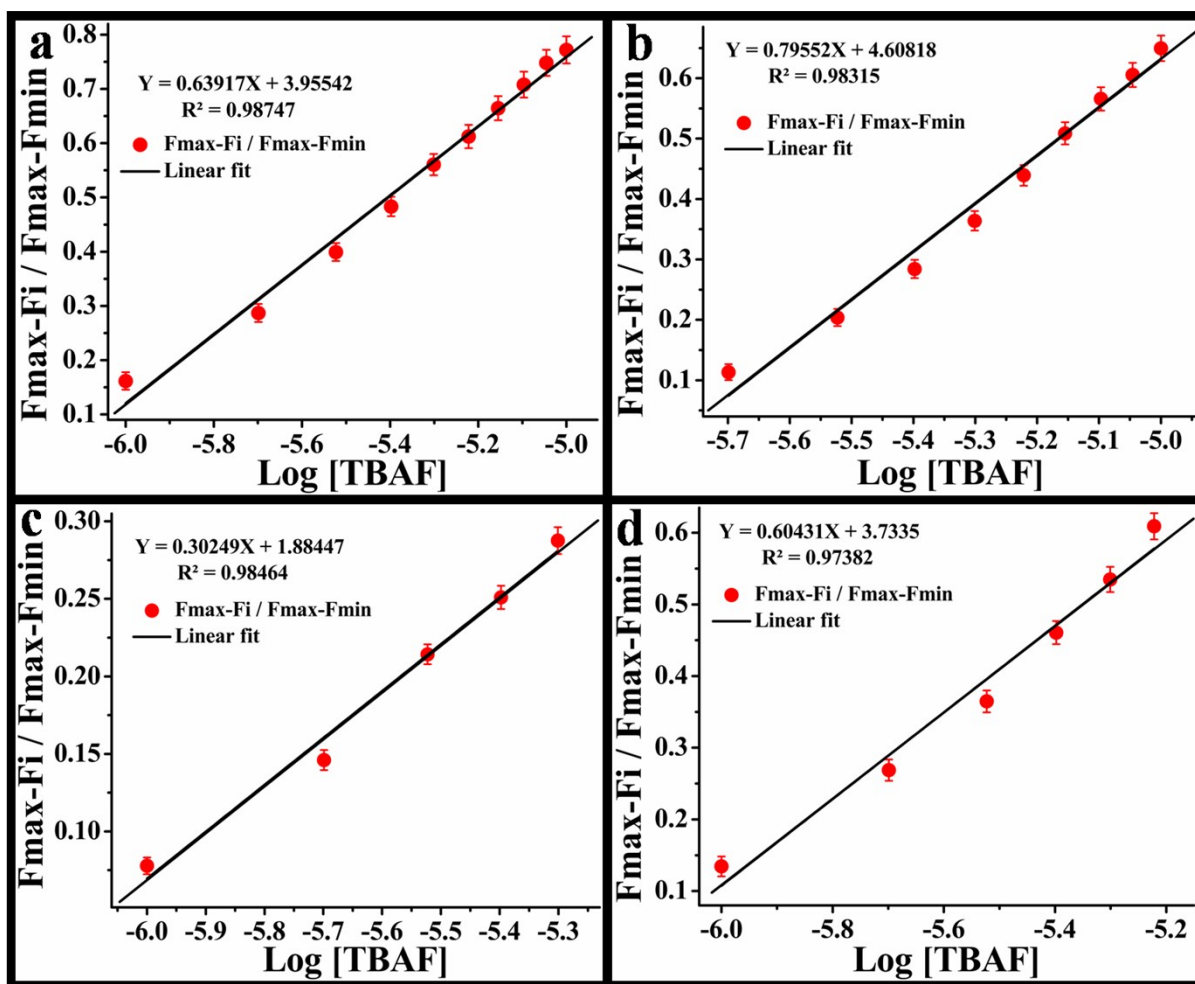

**Figure S6:** Detection limit calculation for fluoride ion in different solvents, (a) Acetone; (b) ACN; (c) DMSO; (d) THF.

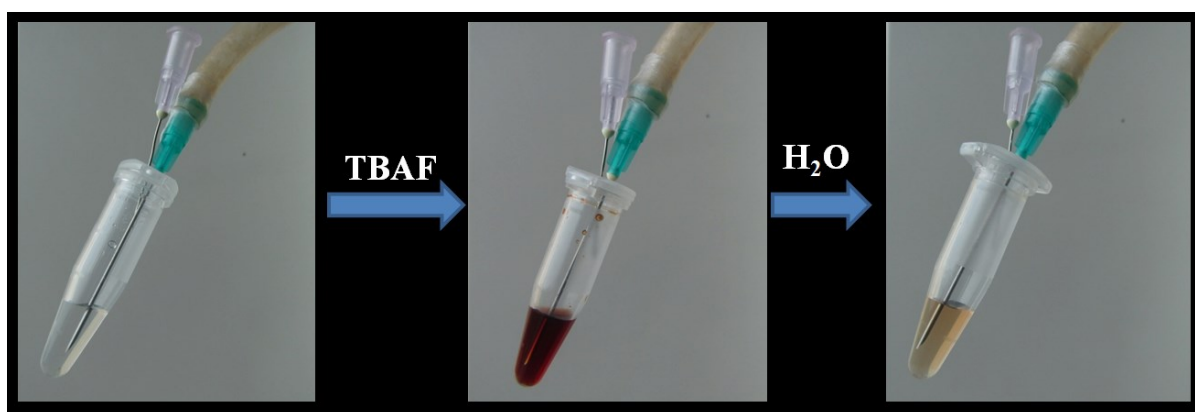

**Figure S7:** Reversible colour changes of compound **1** in DMSO with the addition of TBAF and by the introduction of a trace amount of water in the solvents.



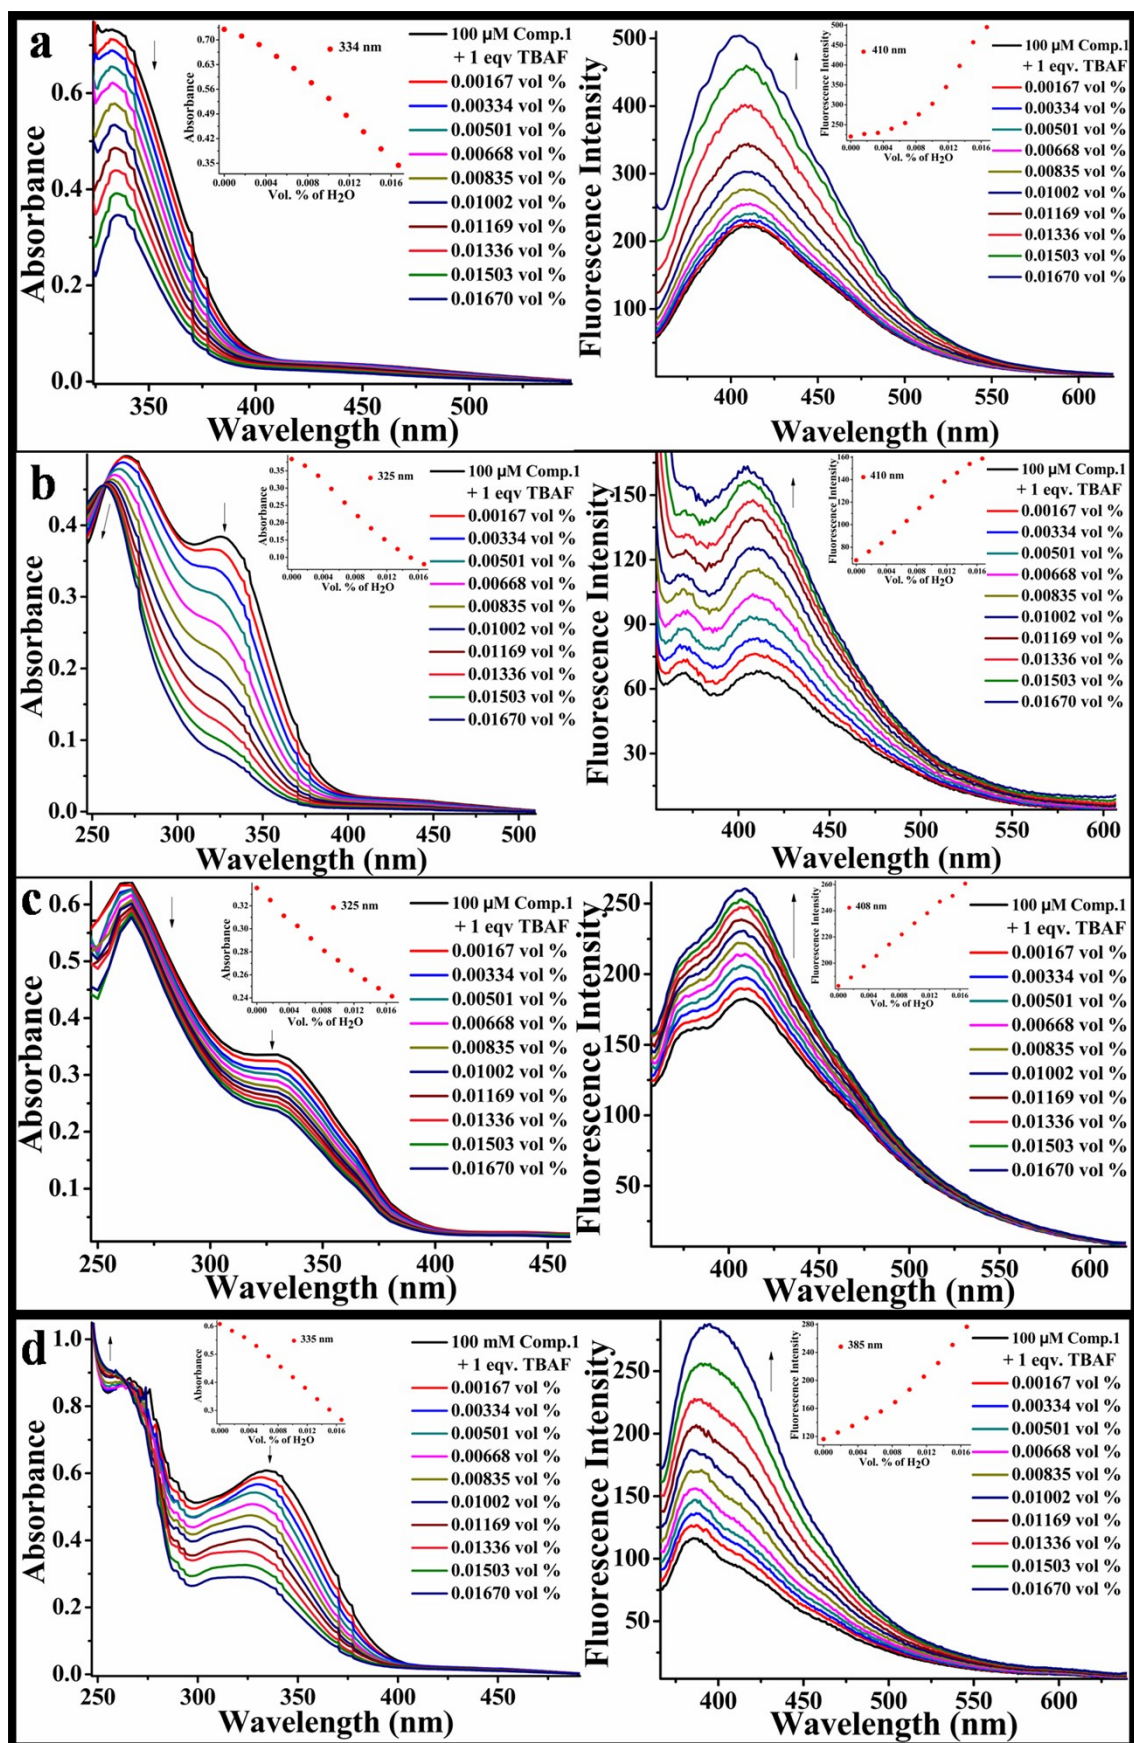

**Figure S8:** Absorption and emission spectra(excitation at 330 nm) of 1.F with the gradual addition of water in different solvents, (a) Acetone; (b) ACN; (c) DMSO; (d) THF (inset graph indicate the linear decrement and increment with different wt% of water respectively).

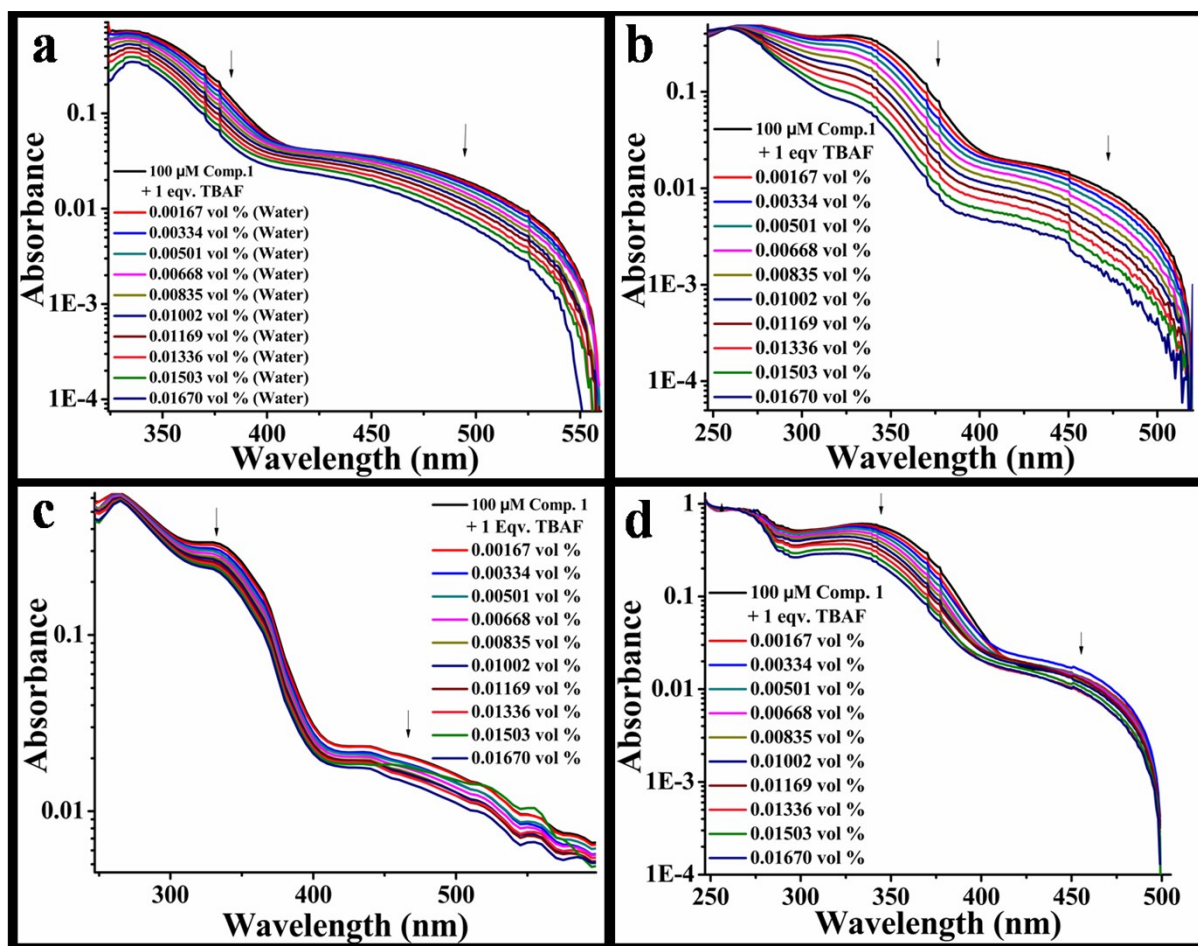

**Figure S9:** Absorption spectra of compound **1.F** with the gradual addition of water in different solvents, (a) Acetone; (b) ACN; (c) DMSO; (d) THF (Every graph as represented in logarithmic scale for better understanding of the band at around 464 nm).

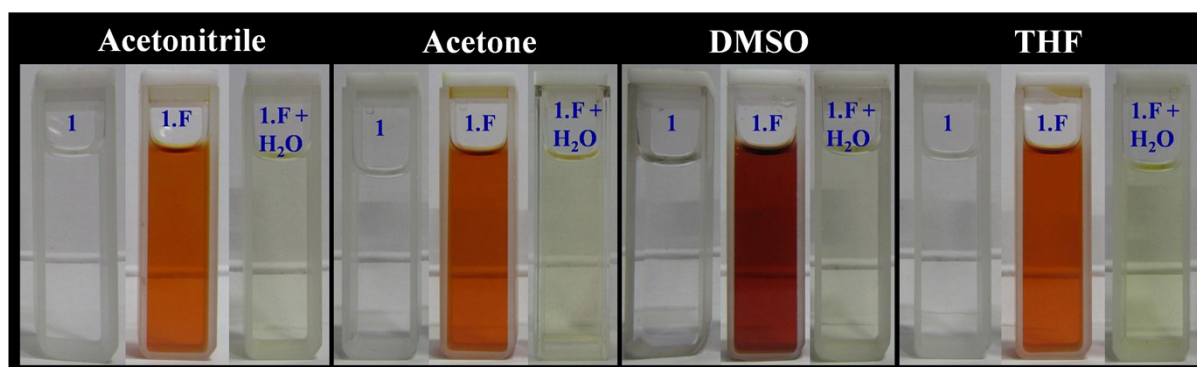

**Figure S10:** Reversible color changes of compound **1** in acetone, ACN, DMSO, and THF with the addition of TBAF and by the introduction of a trace amount of water in the solvents.

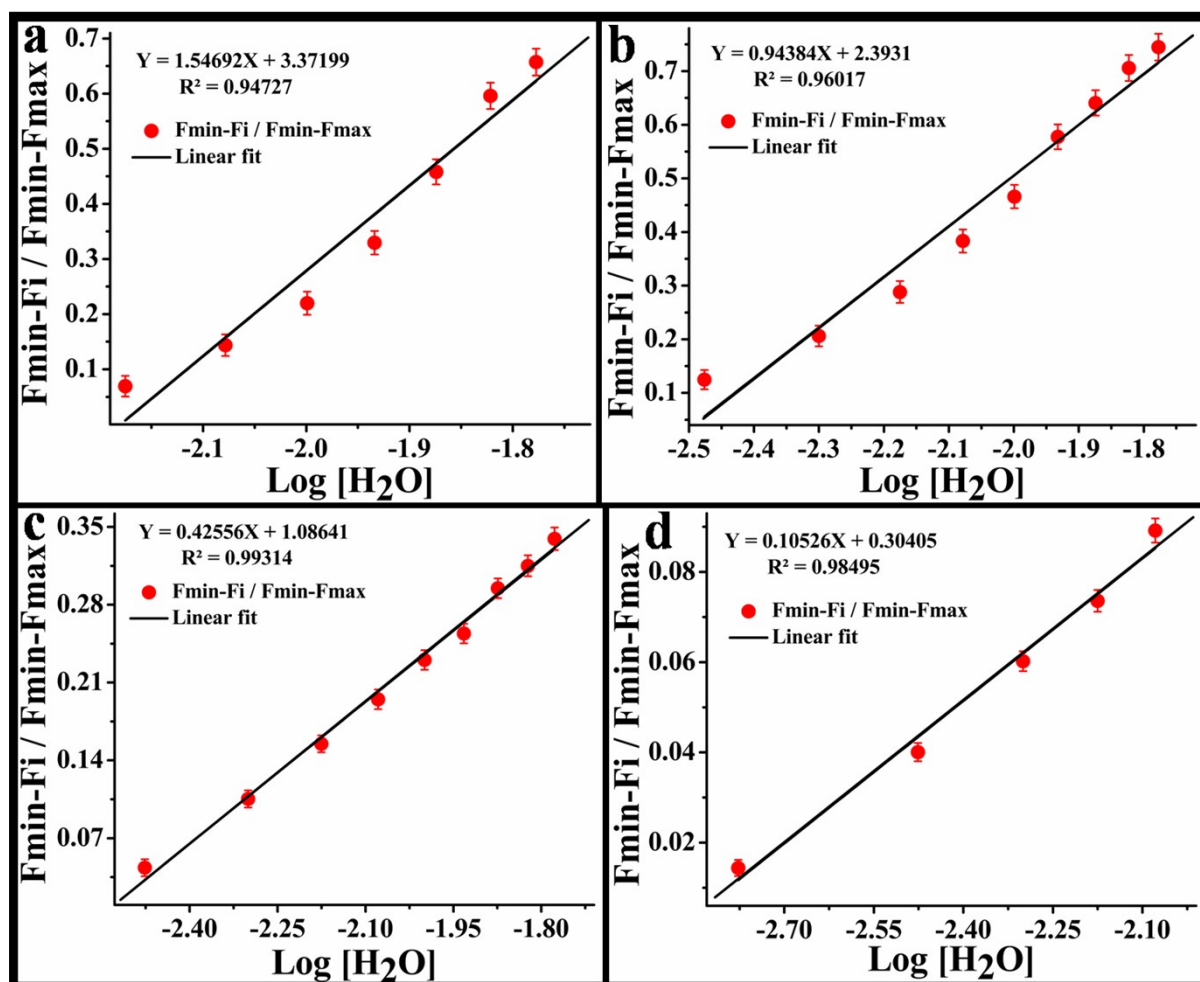

**Figure S11:** Detection limit calculation for moisture in different solvents, (a) Acetone; (b) ACN; (c) DMSO; (d) THF.

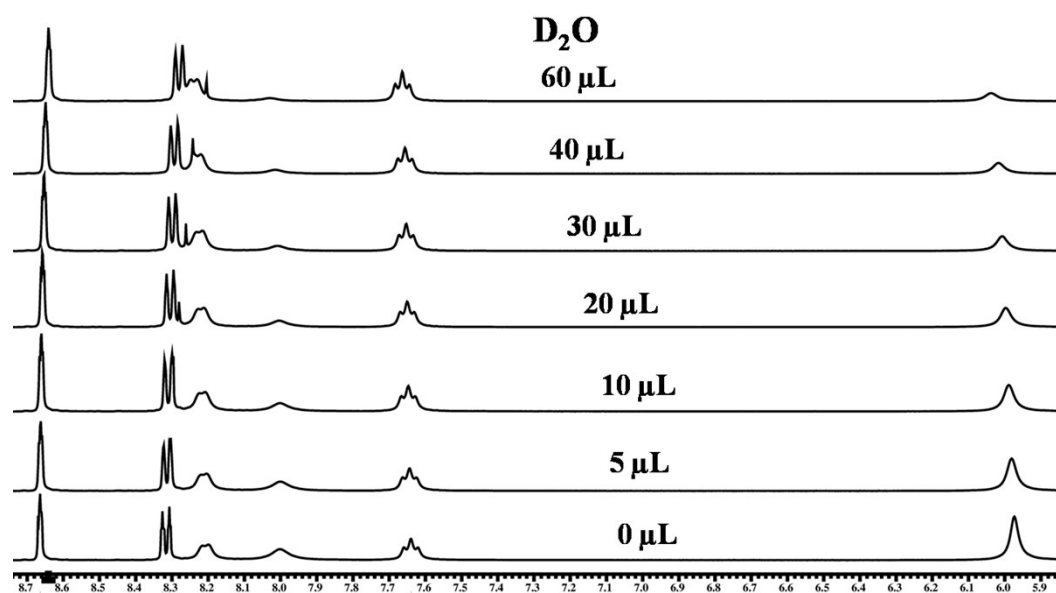

**Figure S12:** NMR titration with the gradual addition of D<sub>2</sub>O in **1.F** using DMSO-d<sub>6</sub> as a solvent.

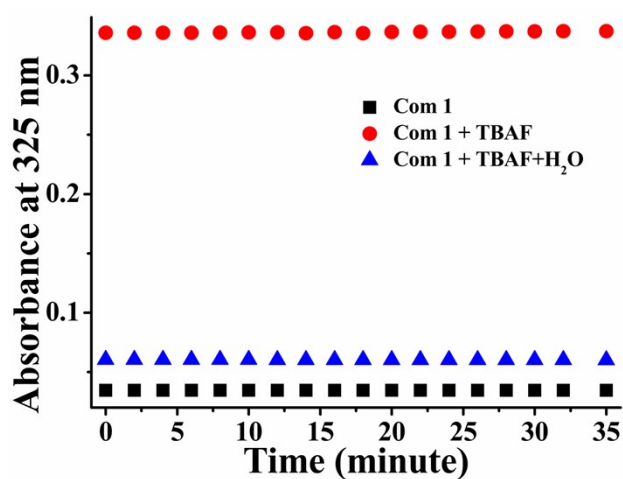

**Figure S13.** Time-dependent absorbance change of **1.F** with 0.016 vol. % of water.

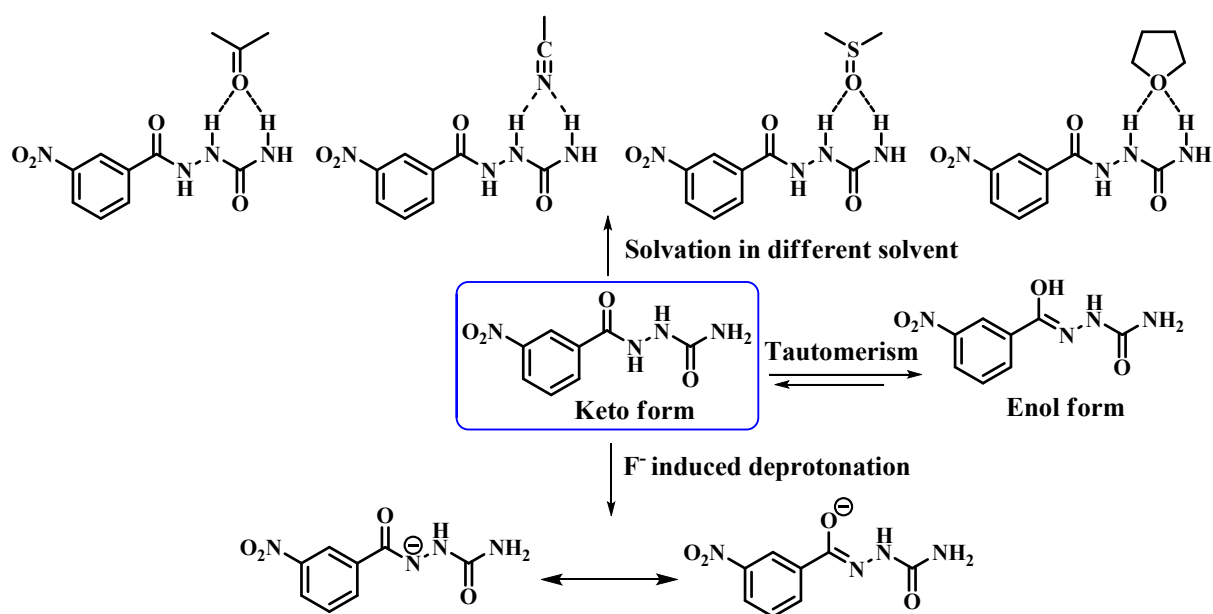

**Scheme S2:** Possible structures of compound **1** from solvation in different solvent and the interaction with the fluoride ion.

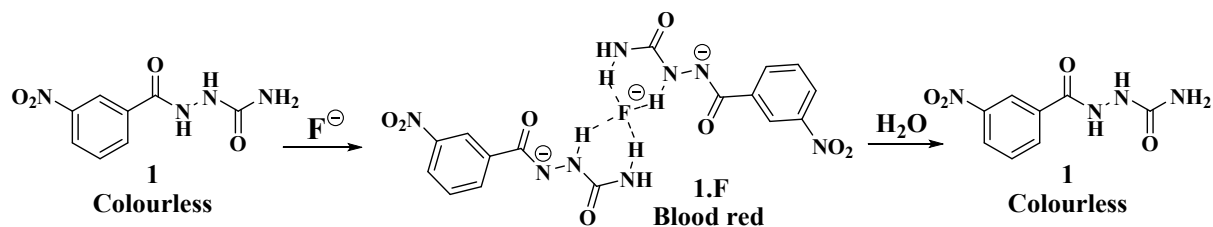

**Scheme S3:** Proposed mechanism for the detection of fluoride and moisture.



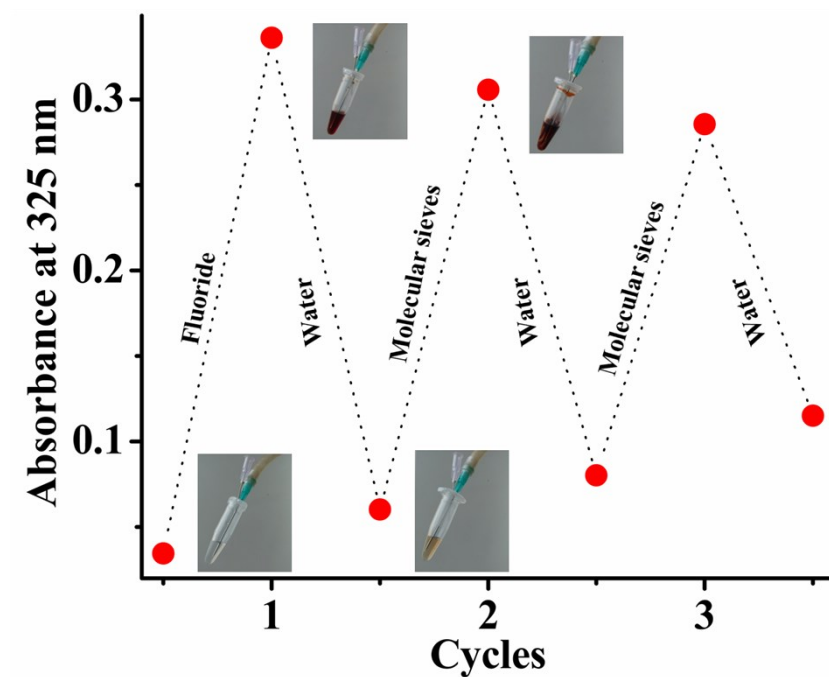

**Figure S14.** Change in absorbance of **1.F** upon the alternate addition of water and molecular sieves.

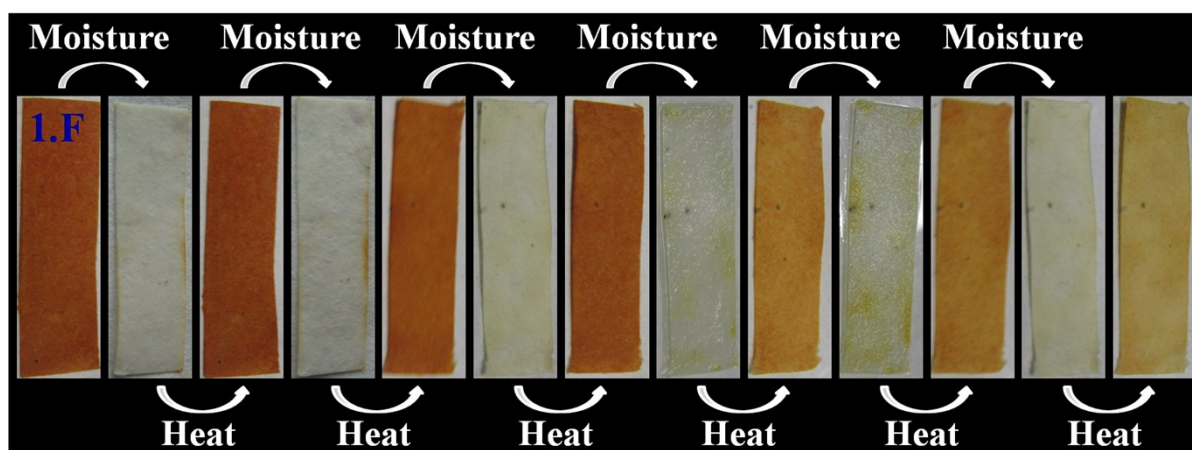

**Figure S15:** Reversibility of mobile test paper strip in the presence of moisture and heat, respectively.

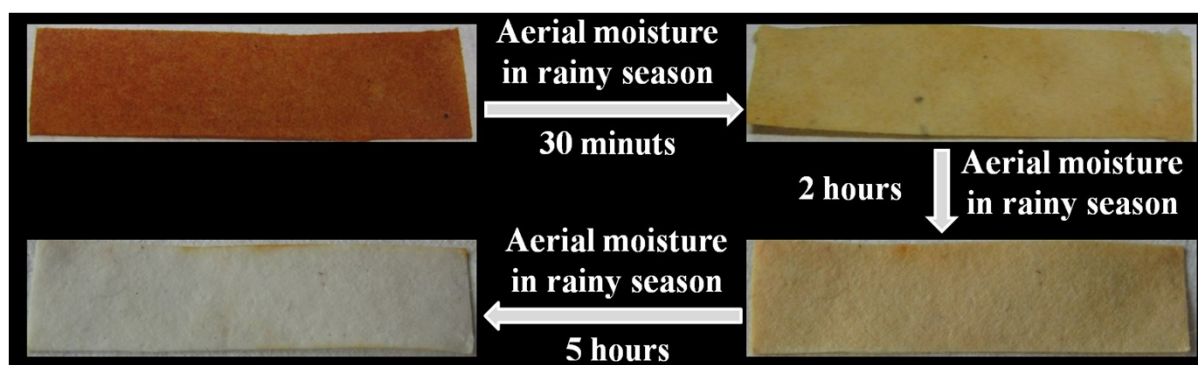

**Figure S16:** Aerial moisture detection by reversible mobile test paper strip.

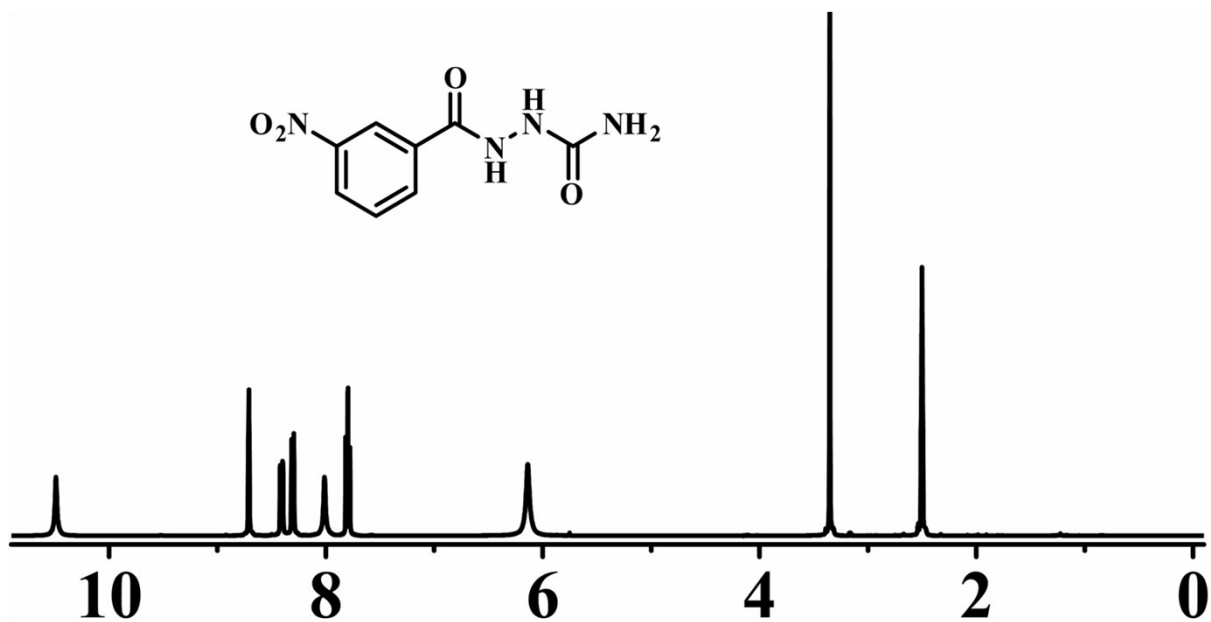

Figure S17: <sup>1</sup>H NMR (400 MHz, DMSO-*d*<sub>6</sub>, δ in ppm, 298K) spectra of compound 1.

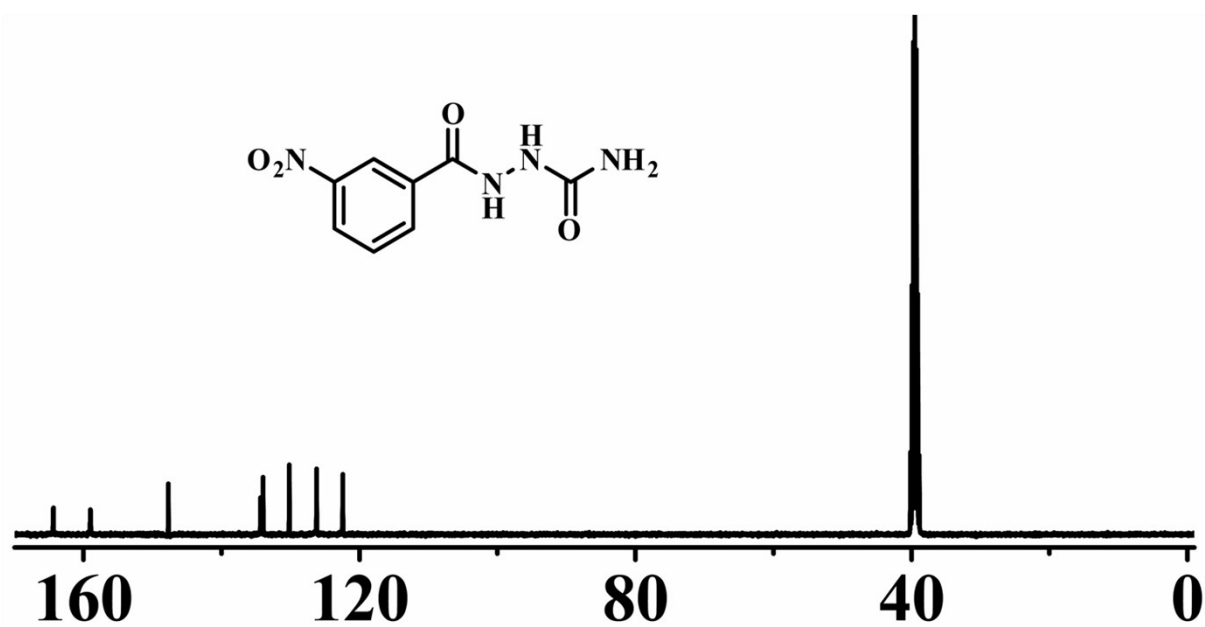

Figure S18: <sup>13</sup>C NMR (100 MHz, DMSO-*d*<sub>6</sub>, δ in ppm, 298K) spectra of compound 1.



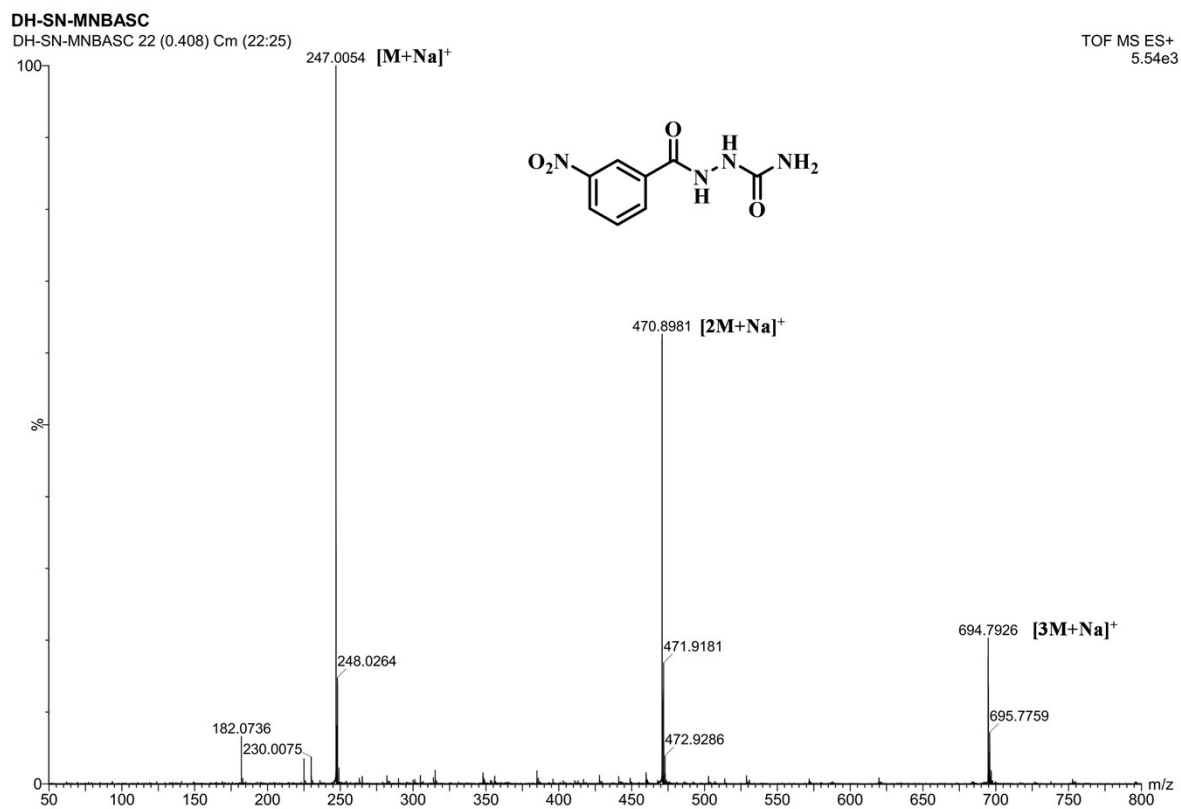

Figure S19: Mass spectrum of compound 1.

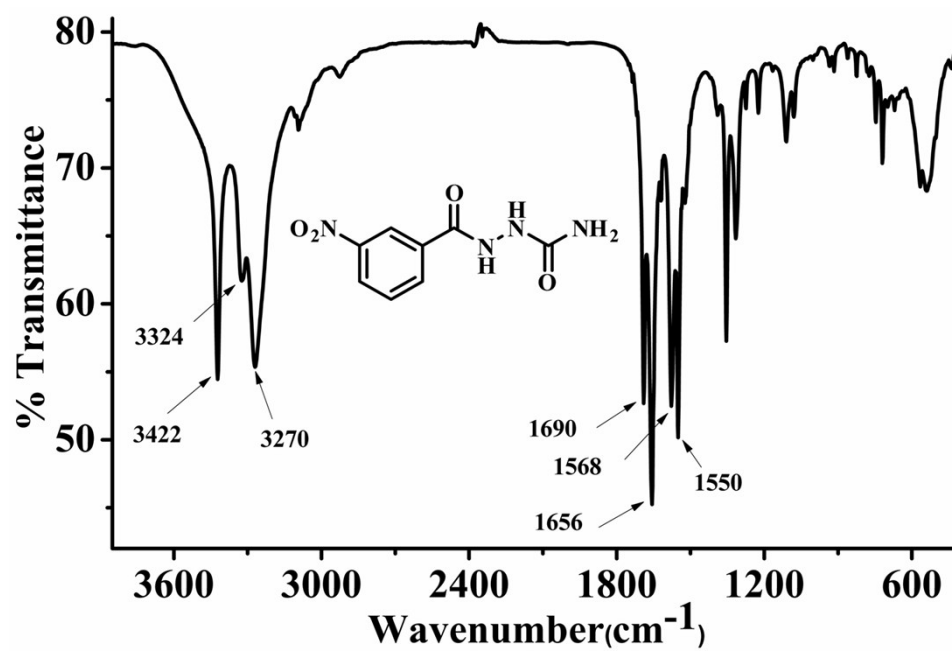

Figure S20: IR spectra of compound 1.

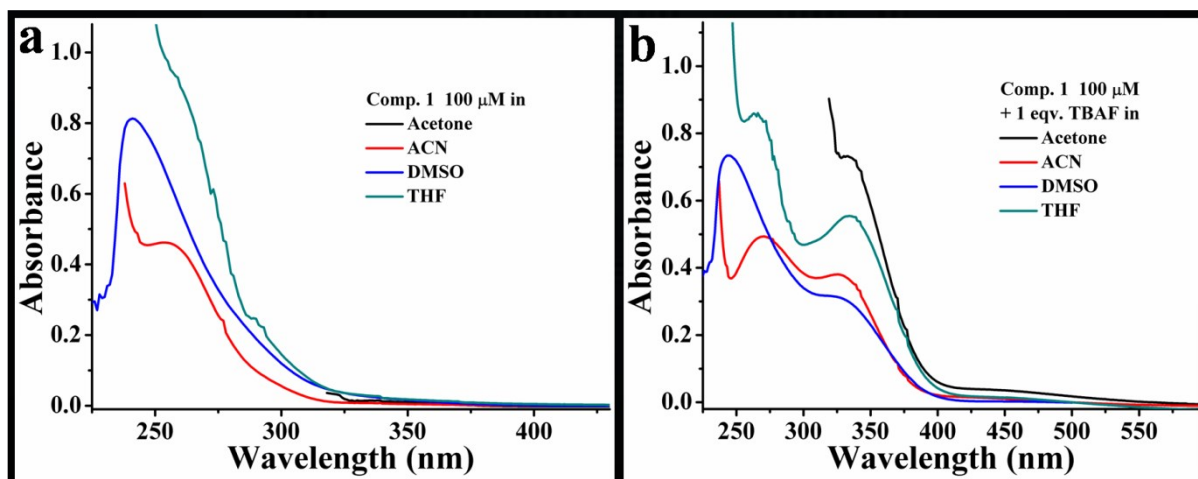

Figure S21: Effect of addition of fluoride ion on compound 1.

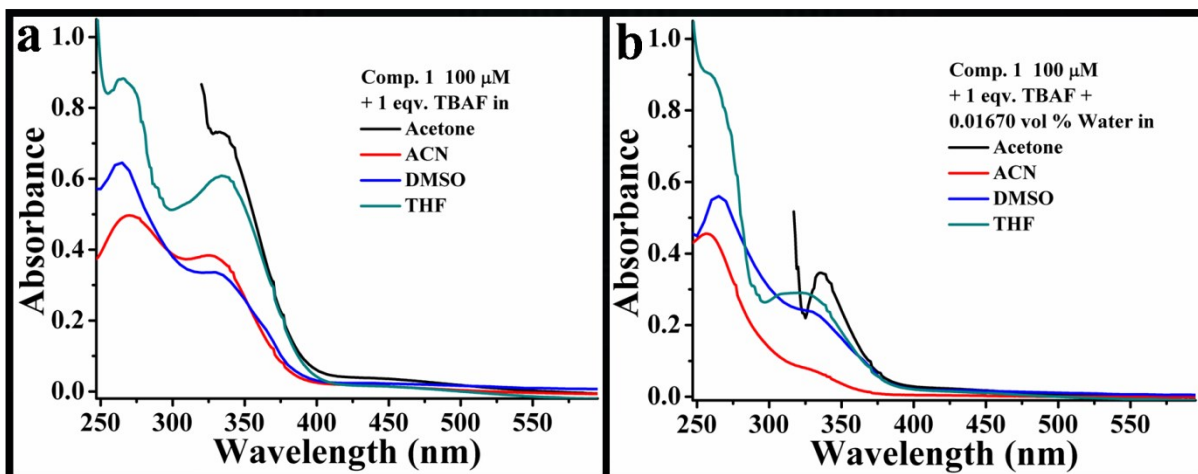

Figure S22: Effect of water on 1-*m*-nitrobenzoyl semicarbazide-fluoride complex.

Chemical Structure of TBAF:

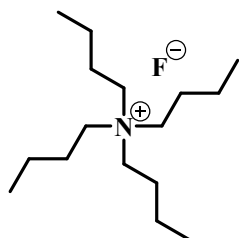

Supplement: d0nj03769a1.pdf [file d0nj03769a1.pdf]
